# Supplementary material for: Influence of imide-substituents on the H-type aggregates of perylene diimides bearing cetyloxy side-chains at bay positions
Source: Royal Society of Chemistry journal article supplement (doi:10.1039/c7sm01918a), 2017-01-01
Supplement: c7sm01918a1.pdf [file c7sm01918a1.pdf]

## ELECTRONIC SUPPORTING INFORMATION (ESI) for

# Influence of imide-substituents on the H-type aggregates of perylene diimides bearing cetyloxy side-chains at bay positions†

Michael Ruby Raj,<sup>a,b</sup> Rajamani Margabandu,<sup>c</sup> Ramalinga Viswanathan Mangalaraja,<sup>a,b</sup> Sambandam Anandan<sup>a</sup>

<sup>a</sup>Nanomaterials & Solar Energy Conversion Lab, Department of Chemistry, National Institute of Technology, Tiruchirappalli-620015, India.

<sup>b</sup>Advanced Ceramics and Nanotechnology Laboratory, Department of Materials Engineering, Faculty of Engineering, University of Concepcion, Concepcion- 4070409, Chile.

<sup>c</sup>Department of Chemistry, Brindavan College, Bhoopasandra, Bangalore-560094, India.

\*Corresponding authors: rmichael@udec.cl (M. Ruby Raj); mangal@udec.cl (R.V. Mangalaraja) & sanand99@yahoo.com (S. Anandan).

| S. no. | Table of Contents                                                                                                                                                                                                                                                                                                                                                                                                                                                                                                                                                                          | Pages |
|--------|--------------------------------------------------------------------------------------------------------------------------------------------------------------------------------------------------------------------------------------------------------------------------------------------------------------------------------------------------------------------------------------------------------------------------------------------------------------------------------------------------------------------------------------------------------------------------------------------|-------|
| 1      | Synthetic methods for the synthesis of intermediate compounds and perylene diimides ( <b>TYR-PDI</b> , <b>AEP-PDI</b> , <b>CET-PDI</b> , <b>ANP-PDI</b> and <b>KOD-PDI</b> )                                                                                                                                                                                                                                                                                                                                                                                                               | 2     |
| 2      | Synthetic methods for the preparation of intermediates compounds                                                                                                                                                                                                                                                                                                                                                                                                                                                                                                                           | 2     |
| 3      | Synthetic methods for the final perylene diimides derivatives                                                                                                                                                                                                                                                                                                                                                                                                                                                                                                                              | 4     |
| 4      | <b>Figure S1.</b> The extended temperature-dependent absorption spectrum of 0–0 and 0–1 vibrational peaks in the region of 470–530 nm for the corresponding PDIs: (a) <b>TYR-PDI</b> ; (b) <b>AEP-PDI</b> ; (c) <b>CET-PDI</b> ; (d) <b>ANP-PDI</b> ; (e) <b>KOD-PDI</b> in chloroform/methylcyclohexane (CHCl <sub>3</sub> /MCH ratio of 1:5) mixed solvent (condition: C <sub>T</sub> = 2x10 <sup>-5</sup> M) during cooling process from 90 to 30 °C.                                                                                                                                   | 7     |
| 5      | <b>Figure S2.</b> (a) The photoluminescence spectra of PDIs in thin-film prepared by spin-coating at 1000 rpm and at room temperature. (b) The extended emission spectrum of PDI thin-films.                                                                                                                                                                                                                                                                                                                                                                                               | 7     |
| 6      | <b>Figure S3.</b> Cyclic voltammetry curves of PDI, (a) in solution and (b) in thin films, in ACN solution containing 0.1 M n-Bu <sub>4</sub> NPF <sub>6</sub> as electrolyte. The measurements were recorded from thin films of PDIs drop-casted from chloroform solutions onto a glassy carbon disk as the working electrode (3.0 mm in diameter) against Ag/Ag <sup>+</sup> as a reference. Each measurement was calibrated with ferrocene at a scan rate of 50 mV s <sup>-1</sup> .                                                                                                    | 8     |
| 7      | <b>Figure S4.</b> The top view of optimized geometry structure of PDIs: (a) <b>TYR-PDI</b> , (b) <b>AEP-PDI</b> , (c) <b>CET-PDI</b> , (d) <b>ANP-PDI</b> and (e) <b>KOD-PDI</b> by using AM1 Hamiltonian semi-empirical methods.                                                                                                                                                                                                                                                                                                                                                          | 9     |
| 8      | <b>Figure S5.</b> Typical SEM images of the rod-like microstructures formed by (a) <b>TYR-PDI</b> ; (b) <b>AEP-PDI</b> ; (c) <b>CET-PDI</b> ; (d) <b>ANP-PDI</b> ; (e) <b>KOD-PDI</b> in methanol-DCM mixed solvents. The SEM image of (c) is obtained at different places indicates the different size of rod-like microstructure with relatively smooth surface and regular edges governed by <b>CET-PDI</b> . SEM images of columnar rectangular ordered H-type PDI aggregates formed in methanol-DCM mixed solvents with volume ratios of 50/50. The scale bar of all images is 10 μm. | 10    |
| 9      | <b>Figure S6.</b> Photographs of Water (top) and Glycerol droplets (bottom) on the surface of PDI derivative thin films with their respective contact angles.                                                                                                                                                                                                                                                                                                                                                                                                                              | 10    |
| 10     | <b>Table S1.</b> The optical properties of aggregate state of PDIs formed at high and low temperature.                                                                                                                                                                                                                                                                                                                                                                                                                                                                                     | 11    |
| 11     | <b>Table S2.</b> The fluorescence life-time results of PDIs.                                                                                                                                                                                                                                                                                                                                                                                                                                                                                                                               | 12    |
| 12     | <b>Table S3.</b> The electrochemical properties and computational results of PDIs.                                                                                                                                                                                                                                                                                                                                                                                                                                                                                                         | 12    |
| 13     | <b>Table S4.</b> Packing parameters derived from XRD measurements.                                                                                                                                                                                                                                                                                                                                                                                                                                                                                                                         | 13    |
| 14     | <b>Table S5.</b> Contact angles and calculated interfacial energy of PDI thin-films using water and glycerol as hydrophilic liquids.                                                                                                                                                                                                                                                                                                                                                                                                                                                       | 14    |

## 1. Synthetic methods for the synthesis of intermediate compounds and perylene diimides (TYR-PDI, AEP-PDI, CET-PDI, ANP-PDI and KOD-PDI).

The compound of 1,7-dibromo-3,4:9,10-perylenetetracarboxylic dianhydride (**1,7-DB-PERI**) was synthesized according to previously reported procedures.<sup>1-4</sup> The substituted alkyl/aromatic amine compounds were previously reported by our groups.<sup>5</sup> The imidization reaction of 1,7-dibromo-3,4:9,10-perylenetetracarboxylic dianhydride with substituted alkyl/aromatic amine compounds were carried out according to following procedures.

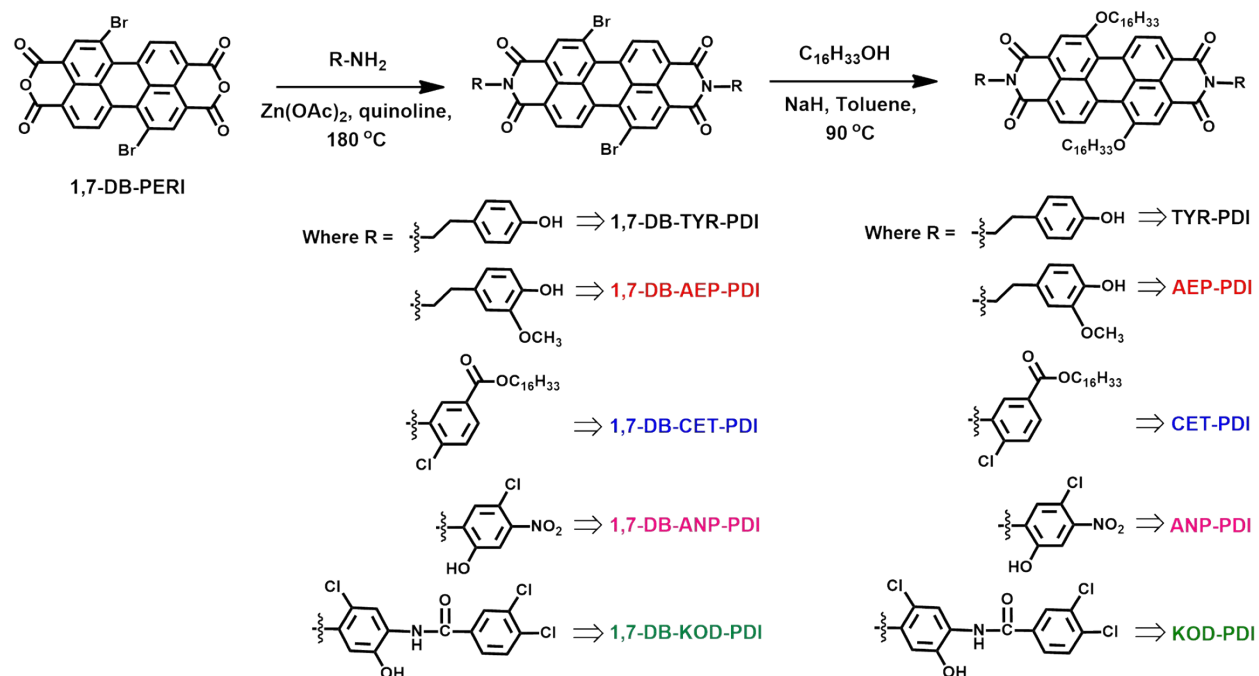

**Scheme S1.** Synthetic routes for the synthesis of intermediate compounds of PDIs and imide-substituents substituted perylene diimides bearing long linear cetyloxy side-chains functionalized at the 1,7-bay positions (**TYR-PDI**, **AEP-PDI**, **CET-PDI**, **ANP-PDI** and **KOD-PDI**).

## 2. Synthetic methods for the preparation of intermediates compounds.

### 2.1. Synthesis of 5,12-Dibromo-2,9-bis(4-hydroxyphenethyl)anthra[2,1,9-def:6,5,10-d'e'f']diisoquinoline-1,3,8,10(2H,9H)-tetraone (**1,7-DB-TYR-PDI**).

A mixture of 1,7-Dibromo-3,4:9,10-perylenetetracarboxylic dianhydride (**1,7-DIBROMO-PERI**) (1 g, 1.8181 mmol), 4-(2-aminoethyl)phenol (Tyramine, **1**) (0.55 g, 4.00 mmol), and  $\text{Zn}(\text{OAc})_2 \cdot 2\text{H}_2\text{O}$  (0.399 g, 1.8181 mmol) in quinoline (10 mL) was heated at 180 °C for overnight under nitrogen atmosphere. After being cooled to room temperature, the reaction mixture was poured into HCl (2 N aq., 25 mL) and stirred for 15 min. The resulting precipitate

was filtered off, washed with water (25 mL) and methanol (25 mL), and dried under vacuum to obtain a crude product. The crude product was column chromatographed on silica gel using initially started with 100% DCM to finally a mixture of CH<sub>2</sub>Cl<sub>2</sub>/methanol (98:2 v/v) as eluent. The collected pure fractions were concentrated under vacuum to afford pure product. The resulting product was dissolved in a minimum volume of CH<sub>2</sub>Cl<sub>2</sub> and precipitated by the addition of methanol to afford regio isomerically pure **1,7-DB-TYR-PDI** upon three successive recrystallizations as reddish brown powder; yield: 77% (1.1 g). <sup>1</sup>H-NMR (400 MHz, CDCl<sub>3</sub>) δ 8.69 (d, 2H, *J*=9.02 Hz, H-perylene), 8.12 (d, 2H, *J*=9.02 Hz, H-perylene), 7.56 (d, 2H, *J*=7.24 Hz, H-perylene), 7.05 (d, 4H, *J*=7.76 Hz, C–H aromatic), 6.60 (d, 2H, *J*=7.04 Hz, C–H aromatic), 5.37 (brs, 2H, O–H aromatic), 3.68 (t, 4H, C–H aliphatic), 2.33 (t, 4H, C–H aliphatic). HR-MASS: calcd for C<sub>40</sub>H<sub>24</sub>Br<sub>2</sub>N<sub>2</sub>O<sub>6</sub> (m/z): 788.44 [M<sup>+</sup>]; found: 789.20 [M+1]. Anal. Calcd. for C<sub>40</sub>H<sub>24</sub>Br<sub>2</sub>N<sub>2</sub>O<sub>6</sub>: C, 60.93; H, 3.07; N, 3.55. Found: C, 60.58; H, 3.22; N, 3.81.

2.2. *Synthesis of 5,12-Dibromo-2,9-bis(4-hydroxy-3-methoxyphenethyl)anthra[2,1,9-def:6,5,10-d'e'f']diisoquinoline-1,3,8,10(2H,9H)-tetraone (1,7-DB-AEP-PDI).*

The above compound was synthesized similar to the synthetic procedure for the synthesis of compound (**1,7-DB-TYR-PDI**). But starting from the compound of 4-(2-aminoethyl)-2-methoxyphenol (**2**) (0.67 g, 4.00 mmol). The isolated product yield is 65 % (1.0 g) as reddish brown powder. <sup>1</sup>H-NMR (400 MHz, CDCl<sub>3</sub>) δ 8.73 (d, 2H, *J*=3.6 Hz, H-perylene), 7.72 (d, 2H, *J*=10.4 Hz, H-perylene), 7.54 (d, 2H, *J*=8.4 Hz, H-perylene), 6.88 (q, 4H, C–H aromatic), 6.72 (d, 2H, *J*=1.6 Hz, C–H aromatic), 5.84 (brs, 2H, O–H aromatic), 3.78 (s, 6H, C–H aromatic). HR-MASS: calcd for C<sub>42</sub>H<sub>28</sub>Br<sub>2</sub>N<sub>2</sub>O<sub>8</sub> (m/z): 848.49 [M<sup>+</sup>]; found: 844 [M–4]. Anal. Calcd. for C<sub>42</sub>H<sub>28</sub>Br<sub>2</sub>N<sub>2</sub>O<sub>8</sub>: C, 59.45; H, 3.33; N, 3.30. Found: C, 58.96; H, 3.74; N, 3.81.

2.3. *Synthesis of Dihexadecyl 3,3'-(5,12-dibromo-1,3,8,10-tetraoxoanthra[2,1,9-def:6,5,10-d'e'f']diisoquinoline-2,9(1H,3H,8H,10H)-diyl)bis(4-chlorobenzoate) (1,7-DB-CET-PDI).*

The above compound was synthesized similar to the synthetic procedure for the synthesis of compound (**1,7-DB-TYR-PDI**). But starting from the compound of hexadecyl 3-amino-4-chlorobenzoate (**3**) (1.58 g, 4.00 mmol). The isolated product yield is 77 % (1.83 g) as bright orange powder. <sup>1</sup>H-NMR (400 MHz, CDCl<sub>3</sub>) δ 7.47 (d, 2H, *J*=1.76 Hz, H-perylene), 7.39 (d, 2H, *J*=1.80 Hz, H-perylene), 7.37 (d, 2H, *J*=1.8 Hz, H-perylene), 7.32 (s, 2H, H-aromatic), 7.30 (d, 2H, *J*=1.72 Hz, C–H aromatic), 7.28 (s, 2H, C–H aromatic), 4.30 (t, 4H, C–H aliphatic), 1.79–1.72 (m, 4H, C–H aliphatic), 1.43–1.27 (m, 60H, C–H aliphatic), 0.90 (m, 6H, C–H aliphatic). HR-MASS: calcd for C<sub>70</sub>H<sub>78</sub>Br<sub>2</sub>Cl<sub>2</sub>N<sub>2</sub>O<sub>8</sub> (m/z): 1306.09 [M<sup>+</sup>]; found: 1310.5 [M+4]. Anal. Calcd. for C<sub>70</sub>H<sub>78</sub>Br<sub>2</sub>Cl<sub>2</sub>N<sub>2</sub>O<sub>8</sub>: C, 64.37; H, 6.02; N, 2.14. Found: C, 63.90; H, 6.41; N, 2.49.

2.4. *Synthesis of 5,12-dibromo-2,9-bis(5-chloro-2-hydroxy-4-nitrophenyl)anthra[2,1,9-def:6,5,10-d'e'f']diisoquinoline-1,3,8,10(2H,9H)-tetraone (1,7-DB-ANP-PDI).*

The above compound was synthesized similar to the synthetic procedure for the synthesis of compound (**1,7-DB-TYR-PDI**). But starting from the compound of 2-amino-4-chloro-5-nitrophenol (**4**) (0.75 g, 4.00 mmol). The isolated product yield is 74 % (1.2 g) as reddish-brown powder. <sup>1</sup>H-NMR (400 MHz, CDCl<sub>3</sub>) δ 8.50 (d, 2H, *J*=1.72 Hz, H-perylene), 7.99 (d, 2H, *J*=1.8 Hz, H-perylene), 7.73 (d, 2H, *J*=2.44 Hz), 7.62 (q, 4H, *J*=1.82 Hz, C–H-aromatic), 7.16 (d, 2H, *J*=6.2 Hz, C–H aromatic), 5.36 (brs, 2H, O–H aromatic). HR-MASS: calcd for C<sub>36</sub>H<sub>12</sub>Br<sub>2</sub>Cl<sub>2</sub>N<sub>4</sub>O<sub>10</sub> (m/z): 891.22 [M<sup>+</sup>]; found: 887 [M–4]. Anal. Calcd. for C<sub>36</sub>H<sub>12</sub>Br<sub>2</sub>Cl<sub>2</sub>N<sub>4</sub>O<sub>10</sub>: C, 48.52; H, 1.36; N, 6.29. Found: C, 48.02; H, 1.78; N, 6.44.

2.5. *Synthesis of N,N'-((5,12-dibromo-1,3,8,10-tetraoxoanthra[2,1,9-def:6,5,10-d'e'f']diisoquinoline-2,9(1H,3H,8H,10H)-diyl)bis(5-chloro-2-hydroxy-4,1-phenylene))bis(3,4-dichlorobenzamide) (1,7-DB-KOD-PDI).*

The above compound was synthesized similar to the synthetic procedure for the synthesis of compound (**1,7-DB-TYR-PDI**). But starting from the compound of N-(4-amino-5-chloro-2-hydroxyphenyl)-3,4-dichlorobenzamide (**5**) (1.33 g, 4.00 mmol). The isolated product yield is 81 % (1.74 g) as reddish-orange solid. <sup>1</sup>H-NMR (400 MHz, CDCl<sub>3</sub>) δ 9.38 (br, 2H, N-H aromatic), 8.55 (s, 2H, *J*=10.4 Hz, H-perylene), 8.23 (d, 2H, *J*=8.12 Hz H-perylene), 7.80 (d, 2H, *J*=8 Hz, C–H aromatic), 7.65 (d, 2H, *J*=1.64 Hz, C-H aromatic), 7.10 (d, 2H, *J*=1.54 Hz, C-H aromatic), 6.8 (d, 2H, *J*=1.72 Hz, C-H aromatic), 5.77 (brs, 2H, O–H aromatic). HR-MASS: calcd for C<sub>50</sub>H<sub>20</sub>Br<sub>2</sub>Cl<sub>6</sub>N<sub>4</sub>O<sub>8</sub> (m/z): 1177.24 [M<sup>+</sup>]; found: 1178.05 [M+1]. Anal. Calcd. for C<sub>50</sub>H<sub>20</sub>Br<sub>2</sub>Cl<sub>6</sub>N<sub>4</sub>O<sub>8</sub>: C, 51.01; H, 1.71; N, 4.76. Found: C, 50.67; H, 2.03; N, 4.90.

### 3. Synthetic methods for the final perylene diimide derivatives:

3.1. *Synthesis of 5,12-bis(hexadecyloxy)-2,9-bis(4-hydroxyphenethyl)anthra[2,1,9-def:6,5,10-d'e'f']diisoquinoline-1,3,8,10(2H,9H)-tetraone (TYR-PDI).*

A mixture of **1** (0.5 g, 0.6341 mmol), Cetyl alcohol (0.54 g, 2.22 mmol), and sodium hydride (NaH, 60 % dispersion in mineral oil) (58 mg, 2.41 mmol) in 30 ml anhydrous toluene were heated to 85–90 °C for 12 h under argon atmosphere. The progress of the reaction was monitored by Thin Layer Chromatography for every 2 hr using DCM/hexane (4:1) as an eluent. The reddish brown reaction mass was cooled to room temperature and then poured into ice water (100 mL) containing 2N HCl solution. The yielded precipitate was filtered on a G4 funnel, washed with hot water (~50 mL), and finally rinsed with methanol and dried under vacuum. The crude product was chromatographed on silica gel 230–400 mesh using CHCl<sub>3</sub>/acetone (30 : 1 ratio) as eluent to afford the product: **reddish brown powder; yield: 88% (0.62 g)**. <sup>1</sup>H-NMR (400 MHz, DMSO-d<sub>6</sub>) δ 7.41 (s, 2H, H-perylene), 7.30 (d, 2H, *J*=9.02 Hz, H-perylene), 7.08 (d, 2H, *J*=7.24 Hz, H-perylene), 6.69 (d, 4H, *J*=7.76 Hz, C–H aromatic), 6.60 (d, 2H, *J*=7.04 Hz, C–H aromatic), 5.66 (brs, 2H, O–H aromatic), 4.22–4.19 (t, 4H, C–H aliphatic), 3.88 (q, 4H, C-H aromatic), 3.69

(t, 6H, C–H aliphatic), 2.87 (brs, 4H, C–H aliphatic), 1.67 (t, 4H, C–H aliphatic), 1.36–1.22 (m, 60H, C–H aliphatic), 0.85 (t, 6H, C–H aliphatic). ESI-MASS: calcd for  $C_{72}H_{90}N_2O_8$  (m/z): 1110.67 [ $M^+$ ]; found: 1128.10 [ $M+NH_4$ ]. Anal. Calcd. for  $C_{72}H_{90}N_2O_8$ : C, 77.80; H, 8.16; N, 2.52. Found: C, 77.38; H, 8.02; N, 2.70.

3.2. *Synthesis of 5,12-Bis(hexadecyloxy)-2,9-bis(4-hydroxy-3-methoxyphenethyl)anthra[2,1,9-def:6,5,10-d'e'f']diisoquinoline-1,3,8,10(2H,9H)-tetraone (AEP-PDI).*

The above compound was synthesized similar to the synthetic procedure for the synthesis of compound (**TYR-PDI**). But starting from the compound (**1,7-DB-AEP-PDI**) (0.5 g, 0.59 mmol), Cetyl alcohol (0.50 g, 2.06 mmol), and NaH (54 mg, 2.24 mmol) in 30 mL anhydrous toluene. The product was obtained after column purification using  $CHCl_3$ /acetone (30:1 ratio) as eluent. The isolated product yield is 87 % (0.6 g) as **reddish brown solid**.  $^1H$ -NMR (400 MHz,  $DMSO-d_6$ )  $\delta$  7.53 (s, 1H, H-perylene), 7.45 (s, 1H, H-perylene), 7.34 (d, 2H,  $J=9$  Hz, H-perylene), 7.18 (d, 2H,  $J=7.3$  Hz, C–H aromatic), 6.69 (d, 4H,  $J=7.76$  Hz, C–H aromatic), 6.60 (d, 2H,  $J=7.04$  Hz, C–H aromatic), 5.66 (brs, 2H, O–H aromatic), 4.20 (t, 4H, C–H aliphatic), 3.88 (brs, 4H, C–H aromatic), 3.69 (d, 6H, C–H aliphatic), 2.69 (brs, 4H, C–H aliphatic), 1.68–1.64 (q, 4H, C–H aliphatic), 1.36–1.33 (m, 60H, C–H aliphatic), 0.84 (t, 6H, C–H aliphatic). ESI-MASS: calcd for  $C_{74}H_{94}N_2O_{10}$  (m/z): 1170.69 [ $M^+$ ]; found: 1139.09 [ $M-2NH_4$ ]. Anal. Calcd. for  $C_{74}H_{94}N_2O_{10}$ : C, 75.86; H, 8.09; N, 2.39; Found: C, 75.32; H, 8.15; N, 2.50.

3.3. *Synthesis of Dihexadecyl 3,3'-(5,12-bis(hexadecyloxy)-1,3,8,10-tetraoxoanthra[2,1,9-def:6,5,10-d'e'f']diisoquinoline-2,9(1H,3H,8H,10H)-diyl)bis(4-chlorobenzoate) (CET-PDI).*

The above compound was synthesized similar to the synthetic procedure for the synthesis of compound (**TYR-PDI**). But starting from the compound (**1,7-DB-CET-PDI**) (0.5 g, 0.38 mmol), Cetyl alcohol (0.32 g, 1.32 mmol), and NaH (35 mg, 1.45 mmol) in 30 ml anhydrous toluene. The product was obtained after column purification using  $CHCl_3$ /acetone (30:1 ratio) as eluent. The isolated product yield is 95 % (0.59 g) as **bright orange solid**.  $^1H$ -NMR (400 MHz,  $DMSO-d_6$ )  $\delta$  7.47 (d, 2H,  $J=1.76$  Hz, H-perylene), 7.39 (d, 2H,  $J=1.8$  Hz H-perylene), 7.37 (q, 2H,  $J=1.8$  Hz and  $J=1.8$  Hz, H-perylene), 7.32 (d, 2H,  $J=1.2$  Hz, C–H-aromatic), 7.30 (m, 2H, C–H aromatic), 7.28 (d, 2H, C–H aromatic), 4.29 (t, 8H, C–H aliphatic), 1.79–1.72 (m, 8H, C–H aliphatic), 1.43–1.27 (m, 120H, C–H aliphatic), 0.90 (m, 12H, C–H aliphatic). ESI-MASS: calcd for  $C_{102}H_{144}Cl_2N_2O_{10}$  (m/z): 1627.02 [ $M^+$ ]; found: 1645 [ $M+NH_4$ ]. Anal. Calcd. for  $C_{102}H_{144}Cl_2N_2O_{10}$ : C, 75.20; H, 8.91; N, 1.72; Found: C, 74.88; H, 9.01; N, 1.90.

3.4. *Synthesis of 2,9-bis(5-chloro-2-hydroxy-4-nitrophenyl)-5,12-bis(hexadecyloxy)anthra[2,1,9-def:6,5,10-d'e'f']diisoquinoline-1,3,8,10(2H,9H)-tetraone (ANP-PDI).*

The above compound was synthesized similar to the synthetic procedure for the synthesis of compound (**TYR-PDI**). But starting from the compound (**1,7-DB-ANP-PDI**) (0.5 g, 0.56 mmol), Cetyl alcohol (0.47 g, 1.96 mmol), and NaH (51 mg, 2.12 mmol) in 30 ml anhydrous toluene. The product was obtained after column purification using CHCl<sub>3</sub>/acetone (30:1 ratio) as eluent. The isolated product yield is 80 % (0.55 g) as reddish-brown solid. <sup>1</sup>H-NMR (400 MHz, DMSO-d<sub>6</sub>) δ 7.45 (d, 2H, *J*=1.74 Hz, H-perylene), 7.39 (d, 2H, *J*=1.8 Hz H-perylene), 7.25 (q, 2H, *J*=1.82 Hz and *J*=1.82 Hz, H-perylene), 6.73 (d, 2H, *J*=1.82 Hz, C-H-aromatic), 6.50 (d, 2H, *J*=9.0Hz, C-H aromatic), 5.66 (brs, 2H, O-H aromatic), 4.18 (t, 4H, C-H aliphatic), 2.00–1.68 (m, 4H, C-H aliphatic), 1.70–1.63 (q, 4H, C-H aliphatic), 1.50–1.20 (m, 60H, C-H aliphatic), 0.88 (t, 6H, C-H aliphatic). ESI-MASS: calcd for C<sub>68</sub>H<sub>78</sub>Cl<sub>2</sub>N<sub>4</sub>O<sub>12</sub> (m/z): 1212.50 [M<sup>+</sup>]; found: 1194.80 [M-NH<sub>4</sub>]. Anal. Calcd. for C<sub>68</sub>H<sub>78</sub>Cl<sub>2</sub>N<sub>4</sub>O<sub>12</sub>: C, 67.26; H, 6.47; N, 4.61; Found: C, 67.04; H, 6.85; N, 4.95.

3.5. *Synthesis of N,N'-((5,12-bis(hexadecyloxy)-1,3,8,10-tetraoxanthra[2,1,9-def:6,5,10-d'e'f']diisoquinoline-2,9(1H,3H,8H,10H)-diyl)bis(5-chloro-2-hydroxy-4,1-phenylene))bis(3,4-dichlorobenzamide) (KOD-PDI).*

The above compound was synthesized similar to the synthetic procedure for the synthesis of compound (**TYR-PDI**). But starting from the compound (**1,7-DB-KOD-PDI**) (0.5 g, 0.425 mmol), Cetyl alcohol (0.36 g, 1.48 mmol), and NaH (39 mg, 1.61 mmol) in 30 ml anhydrous toluene. The product was obtained after column purification using CHCl<sub>3</sub>/acetone (30:1 ratio) as eluent. The isolated product yield is 92 % (0.58 g) as reddish-orange solid. <sup>1</sup>H-NMR (400 MHz, DMSO-d<sub>6</sub>) δ 9.58 (brs, 2H, N-H aromatic), 8.18 (s, 2H, H-perylene), 7.91 (d, 2H, *J*=8.12 Hz H-perylene), 7.78 (d, 2H, *J*=8 Hz, C-H aromatic), 7.41 (d, 2H, *J*=1.64 Hz, C-H aromatic), 7.29 (t, 4H, C-H aromatic), 5.66 (brs, 2H, O-H aromatic), 4.23–4.09 (t, 4H, C-H aliphatic), 1.70–1.63 (q, 4H, C-H aliphatic), 1.37–1.22 (m, 60H, C-H aliphatic), 0.85 (t, 6H, C-H aliphatic). ESI-MASS: calcd for C<sub>82</sub>H<sub>86</sub>Cl<sub>6</sub>N<sub>4</sub>O<sub>10</sub> (m/z): 1496.45 [M<sup>+</sup>]; found: 1514.02 [M+NH<sub>4</sub>]. Anal. Calcd. for C<sub>82</sub>H<sub>86</sub>Cl<sub>6</sub>N<sub>4</sub>O<sub>10</sub>: C, 65.65; H, 5.78; N, 3.73; Found: 65.27; H, 5.91; N, 3.94.

**Figure S1.** The extended temperature-dependent absorption spectrum of 0–0 and 0–1 vibrational peaks in the region of 470–530 nm for the corresponding PDIs: (a) **TYR-PDI**; (b) **AEP-PDI**; (c)

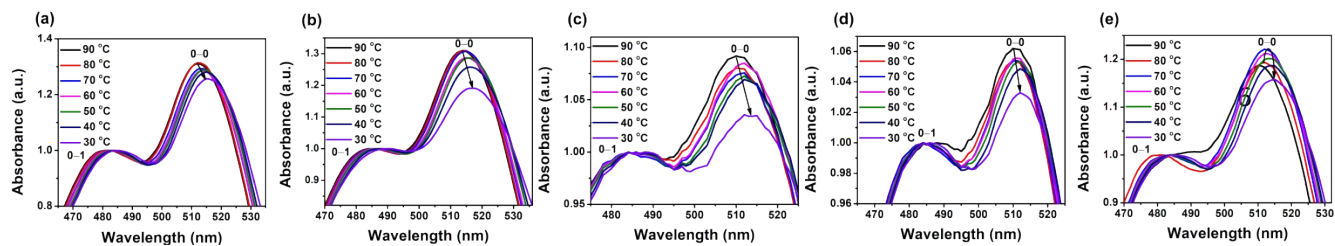

**CET-PDI**; (d) **ANP-PDI**; (e) **KOD-PDI** in chloroform/methylcyclohexane ( $\text{CHCl}_3/\text{MCH}$  ratio of 1:5) mixed solvent (condition:  $C_T = 2 \times 10^{-5}$  M) during cooling process from 90 to 30 °C.

**Figure S2.** (a) The photoluminescence spectra of PDIs in thin-film prepared by spin-coating at 1000 rpm and at room temperature. (b) The extended emission spectrum of PDI thin-films.

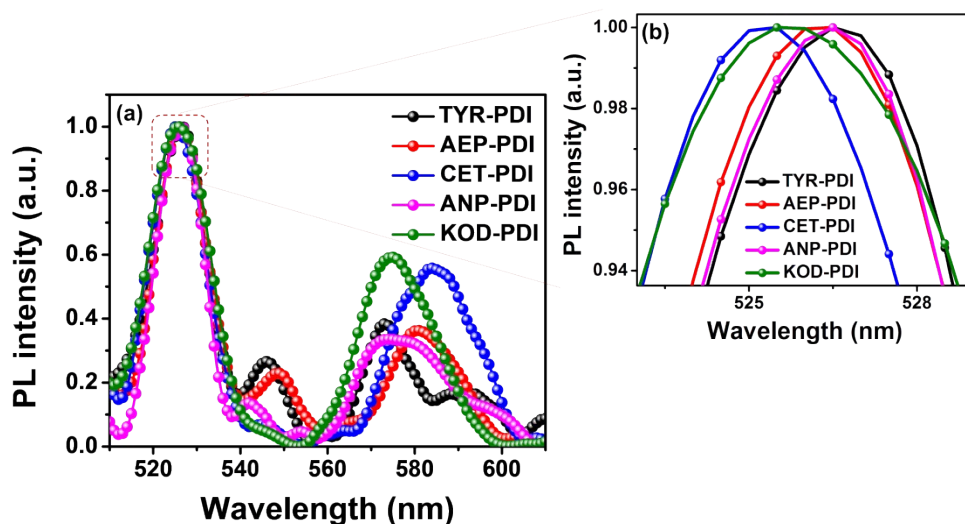

**Figure S3.** Cyclic voltammetry curves of PDI compounds, (a) in solution and (b) in thin films, in ACN solution containing 0.1 M  $n\text{-Bu}_4\text{NPF}_6$  as electrolyte. The measurements were recorded from chloroform solution (concentration of 5 mM) as well as thin films of PDIs drop-casted from chloroform solutions onto a glassy carbon disk as the working electrode (3.0 mm in diameter) against  $\text{Ag}/\text{Ag}^+$  as a reference. Each measurement was calibrated with ferrocene at a scan rate of  $50 \text{ mV s}^{-1}$ .

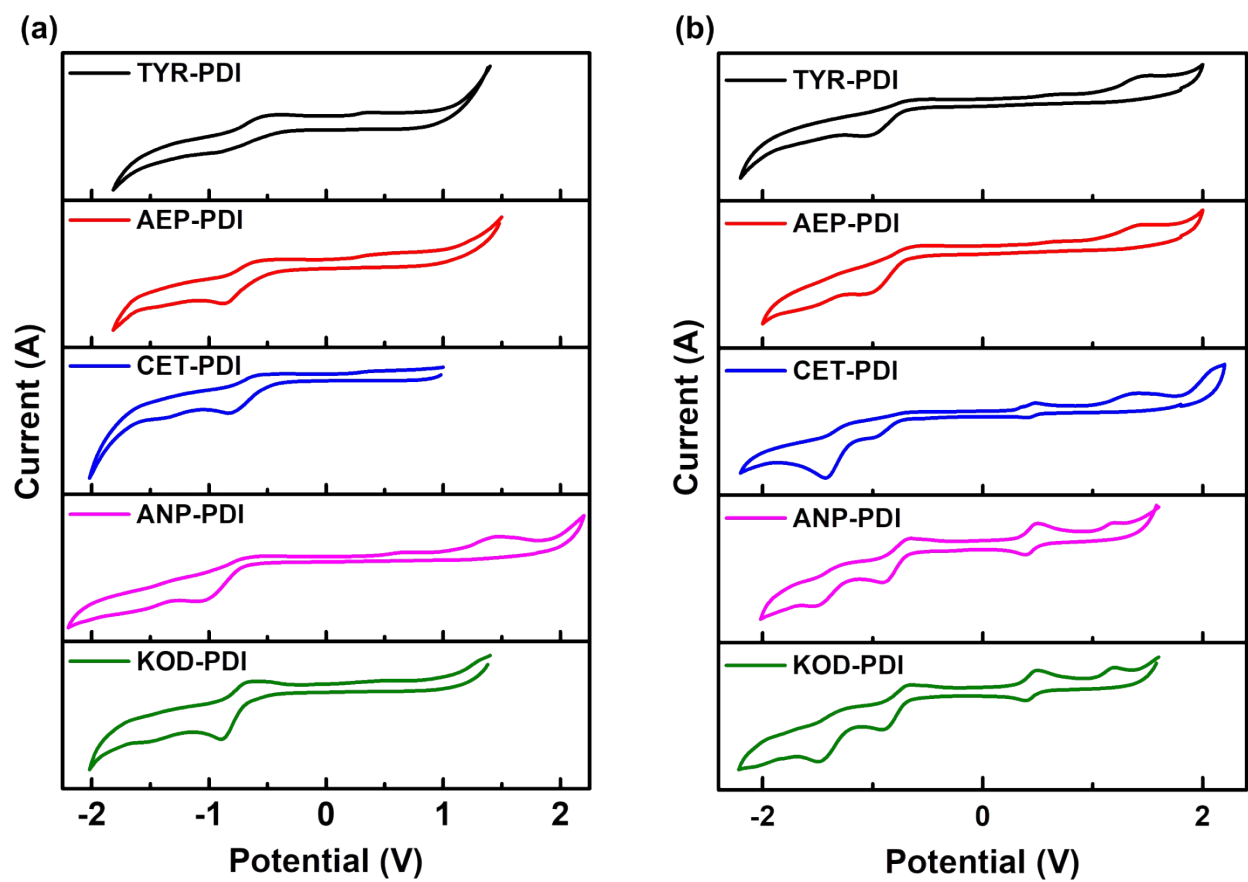

**Figure S4.** The top view of optimized geometry structure of PDIs: (a) **TYR-PDI**, (b) **AEP-PDI**, (c) **CET-PDI**, (d) **ANP-PDI** and (e) **KOD-PDI** by using AM1 Hamiltonian semi-empirical methods.



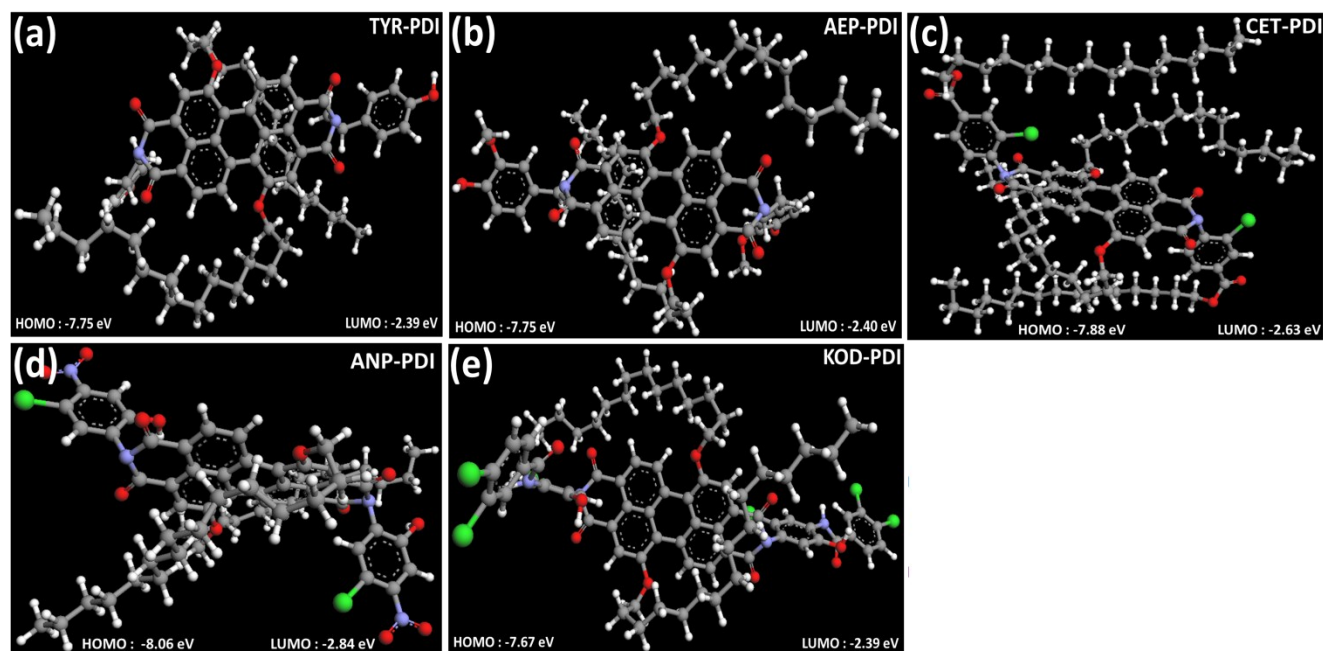

**Figure S5.** Typical SEM images of the rod-like microstructures formed by (a) **TYR-PDI**; (b) **AEP-PDI**; (c) **CET-PDI**; (d) **ANP-PDI**; (e) **KOD-PDI** in methanol-DCM mixed solvents. The SEM image of (c) is obtained at different places indicates the different size of rod-like microstructure with relatively smooth surface and regular edges governed by **CET-PDI**. SEM images of columnar rectangular ordered H-type PDI aggregates formed in methanol-DCM mixed solvents with volume ratios of 50/50. The scale bar of all images is 10  $\mu\text{m}$ .

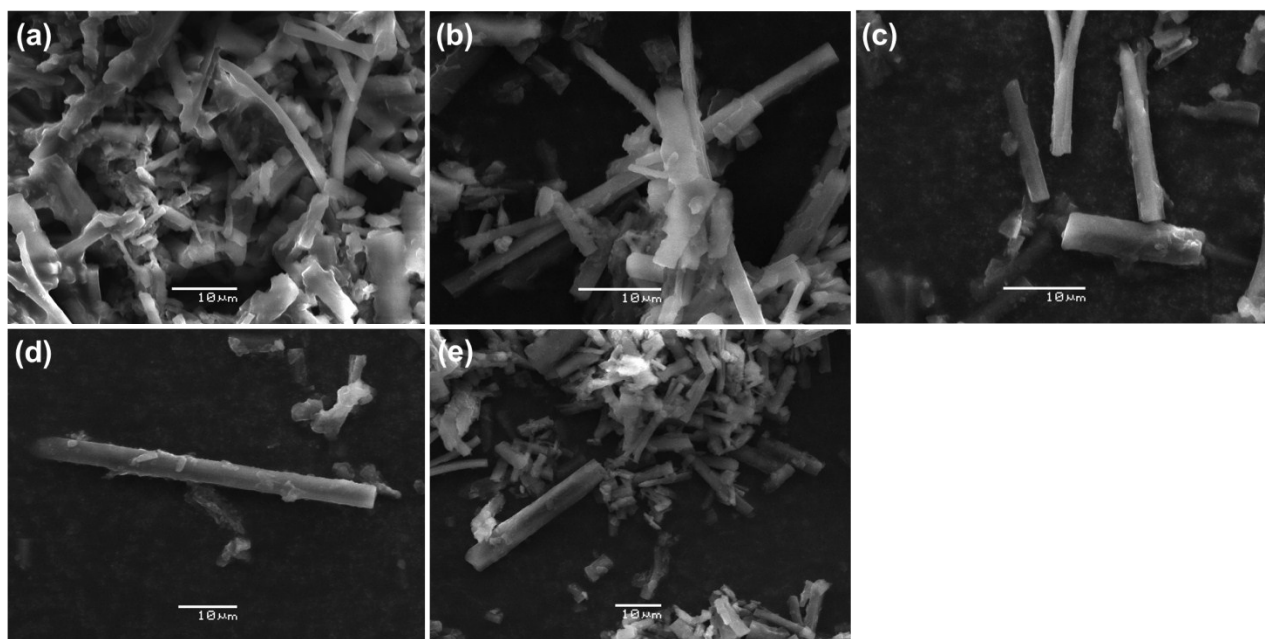

**Figure S6.** Photographs of Water (top) and Glycerol droplets (bottom) on the surface of PDI thin films with their respective contact angles.

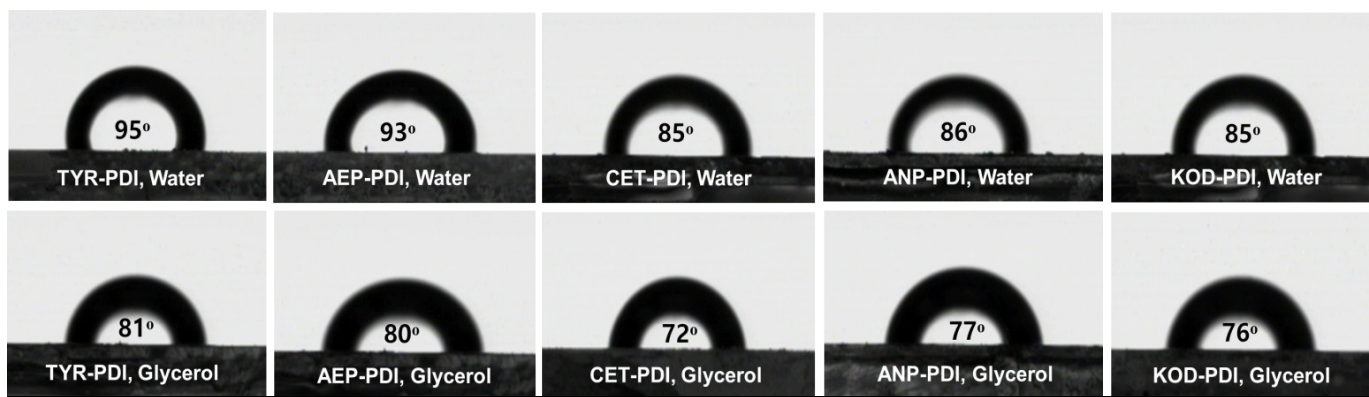

**Table S1.** The optical properties of aggregate state of PDIs formed at high and low temperature.

| Perylene<br>Diimides | condition | $\lambda_{max}^{0-0, soln}$ | $\lambda_{max}^{0-1, soln}$ | $\lambda_{max}^{Sh.p, soln}$ | $A_{0-0}/A_{0-1}$ |
|----------------------|-----------|-----------------------------|-----------------------------|------------------------------|-------------------|
|                      |           | (nm) <sup>a</sup>           | (nm) <sup>a</sup>           | (nm) <sup>b</sup>            |                   |
| <del>TYR-PDI</del>   | 90 °C     | 512                         | 482                         | --                           | 1.34              |

|                          |       |                                        |         |                                                                                                       |                               |
|--------------------------|-------|----------------------------------------|---------|-------------------------------------------------------------------------------------------------------|-------------------------------|
|                          | 30 °C | 515                                    | 484     | 561                                                                                                   | 1.29                          |
|                          | 90 °C | 514                                    | 485     | --                                                                                                    | 1.33                          |
| <b>AEP-PDI</b>           |       |                                        |         |                                                                                                       |                               |
| <b>Perylene Diimides</b> |       | <b>Emission<br/>(wavelength in nm)</b> |         | <b><math>t_f</math> (ns)<br/>(<math>\tau_1</math>, <math>\tau_2</math> &amp; <math>\tau_3</math>)</b> |                               |
|                          | 30 °C | 515                                    | 410 488 | 561                                                                                                   | 0.80 & 1.31 <sup>a</sup> 1.03 |
|                          | 90 °C | 510                                    | 440 488 | 561                                                                                                   | 0.96 & 3.91 <sup>a</sup> 1.06 |
| <b>TRY-PDI</b>           | 30 °C | 512                                    | 565 486 | 561                                                                                                   | 1.35 & 3.90 <sup>a</sup> 1.03 |
| <b>ANP-PDI</b>           | 90 °C | 510                                    | 410 484 | 561                                                                                                   | 0.90 & 1.42 <sup>a</sup> 1.17 |
| <b>KOD-PDI</b>           | 30 °C | 515                                    | 440 484 | 561                                                                                                   | 0.90 & 1.54 <sup>a</sup> 1.15 |
| <b>AEP-PDI</b>           |       |                                        | 540     |                                                                                                       | 0.79 & 1.60                   |
| <b>CET-PDI</b>           |       |                                        | 395     |                                                                                                       | 0.85 & n.d.                   |
|                          |       |                                        | 490     |                                                                                                       | 0.81 & 2.65                   |
|                          |       |                                        | 565     |                                                                                                       | 0.93 & 4.52                   |
| <b>ANP-PDI</b>           |       |                                        | 395     |                                                                                                       | 0.82 & n.d.                   |
|                          |       |                                        | 495     |                                                                                                       | 0.56 & 4.84                   |
|                          |       |                                        | 565     |                                                                                                       | 1.43 & 3.98                   |
| <b>KOD-PDI</b>           |       |                                        | 490     |                                                                                                       | 0.81, 1.56 & 5.70             |
|                          |       |                                        | 570     |                                                                                                       | 0.78, 2.22 & 5.96             |
|                          |       |                                        | 635     |                                                                                                       | 0.57, 1.81 & 5.71             |

<sup>a</sup>The spectral data are obtained from the concentration of  $2 \times 10^{-5}$  M in chloroform/methyl cyclohexane mixed solvent (CHCl<sub>3</sub>/MCH ratio of 1:5); <sup>b</sup>Sh.p: Shoulder peaks are appeared at longer wavelength:  $A_{sh}/A_{0-1}$  is obtained from 0–0/0–1 absorption peak ratio.

**Table S2.** The fluorescence lifetime results of PDIs.

**Table** <sup>n.d.: not detected</sup> **S3.** The electrochemical properties and computational results of PDIs.

| <b>Perylene<br/>Diimides</b> | $E_{Oxd}^{CV}$<br>(V) <sup>a</sup> | $E_{Red}^{CV}$<br>(V) <sup>a</sup> | $E_{HOMO}^{CV}$<br>(eV) <sup>a</sup> | $E_{LUMO}^{CV}$<br>(eV) <sup>a</sup> | $E_{Oxd}^{CV}$<br>(V) <sup>b</sup> | $E_{Red}^{CV}$<br>(V) <sup>b</sup> | $E_{HOMO}^{CV}$<br>(eV) <sup>b</sup> | $E_{LUMO}^{CV}$<br>(eV) <sup>b</sup> | $E_{HOMO}^{AM1}$<br>(eV) <sup>c</sup> | $E_{LUMO}^{AM1}$<br>(eV) <sup>c</sup> |
|------------------------------|------------------------------------|------------------------------------|--------------------------------------|--------------------------------------|------------------------------------|------------------------------------|--------------------------------------|--------------------------------------|---------------------------------------|---------------------------------------|
|------------------------------|------------------------------------|------------------------------------|--------------------------------------|--------------------------------------|------------------------------------|------------------------------------|--------------------------------------|--------------------------------------|---------------------------------------|---------------------------------------|

|                |       |        |       |       |       |        |       |       |       |       |
|----------------|-------|--------|-------|-------|-------|--------|-------|-------|-------|-------|
| <b>TYR-PDI</b> | 1.059 | -0.395 | -5.37 | -3.92 | 1.102 | -0.735 | -5.41 | -3.57 | -7.75 | -2.39 |
| <b>AEP-PDI</b> | 1.056 | -0.482 | -5.36 | -3.82 | 1.065 | -0.701 | -5.37 | -3.61 | -7.75 | -2.40 |
| <b>CET-PDI</b> | 0.994 | -0.479 | -5.30 | -3.83 | 1.040 | -0.757 | -5.35 | -3.55 | -7.88 | -2.63 |
| <b>ANP-PDI</b> | 1.092 | -0.674 | -5.40 | -3.63 | 1.028 | -0.693 | -5.34 | -3.62 | -8.06 | -2.84 |
| <b>KOD-PDI</b> | 1.040 | -0.653 | -5.35 | -3.66 | 1.045 | -0.696 | -5.35 | -3.61 | -7.67 | -2.39 |

$E_{ox}$  is onset oxidation potential and  $E_{red}$  is onset reduction potential are estimated by using Cyclic voltammetric (CV) analysis, <sup>a</sup>Cyclic voltammetry determined in chloroform solution (Conc., of 5 mM) of PDIs vs. Fc/Fc<sup>+</sup> ( $E_{HOMO} = -4.80$  eV); <sup>b</sup>Cyclic voltammetry determined in thin-film of PDIs vs. Fc/Fc<sup>+</sup> ( $E_{HOMO} = -4.80$  eV) as an internal standard; <sup>c</sup>Computational analysis was performed by using Austin Model 1 (AM1) Hamiltonian semi-empirical method.

**Table S4.** Packing parameters derived from XRD measurements.

| Perylene diimides | Crystallographic parameters |                       |                             |                                                  |
|-------------------|-----------------------------|-----------------------|-----------------------------|--------------------------------------------------|
|                   | 2 $\theta$ (degree)         | <i>d</i> -spacing (Å) | Miller index ( <i>hkl</i> ) | Phase (lattice constants)                        |
| <b>TYR-PDI</b>    | 3.20                        | 27.58                 | (100)                       | Col <sub>rd</sub> (a = 27.38 Å)<br>(b = 14.40 Å) |
|                   | 6.45                        | 13.69                 | (200)                       |                                                  |
|                   | 6.95                        | 12.75                 | (110)                       |                                                  |
|                   | 9.46                        | 9.34                  | (300)                       |                                                  |
|                   | 12.25                       | 7.22                  |                             |                                                  |
|                   | 13.03                       | 6.79                  | (400)                       |                                                  |
|                   | 16.50                       | 5.37                  | (500)                       |                                                  |
|                   | 18.00                       | 4.93                  | (600)                       |                                                  |
|                   | 19.63                       | 4.52                  | (700)                       |                                                  |
|                   | 22.66                       | 3.92                  | (002)                       |                                                  |
|                   | 25.92                       | 3.44                  | (102)                       |                                                  |
| <b>AEP-PDI</b>    | 3.27                        | 27.0                  | (100)                       | Col <sub>rp</sub> (a = 27.06 Å)<br>(b = 14.40 Å) |
|                   | 6.53                        | 13.53                 | (200)                       |                                                  |
|                   | 6.95                        | 12.75                 | (110)                       |                                                  |
|                   | 9.40                        | 9.40                  | (300)                       |                                                  |
|                   | 13.11                       | 6.75                  | (400)                       |                                                  |
|                   | 13.65                       | 6.48                  |                             |                                                  |
|                   | 16.42                       | 5.39                  | (500)                       |                                                  |
|                   | 18.14                       | 4.89                  | (600)                       |                                                  |
|                   | 19.73                       | 4.50                  | (700)                       |                                                  |
|                   | 22.75                       | 3.90                  | (002)                       |                                                  |
|                   | 26.02                       | 3.42                  | (102)                       |                                                  |
| <b>CET-PDI</b>    | 3.27                        | 27.00                 | (100)                       | Col <sub>rp</sub> (a = 27.00 Å)<br>(b = 14.43 Å) |
|                   | 6.54                        | 13.50                 | (200)                       |                                                  |
|                   | 6.97                        | 12.78                 | (110)                       |                                                  |
|                   | 9.40                        | 9.34                  | (300)                       |                                                  |
|                   | 12.31                       | 7.18                  | (400)                       |                                                  |
|                   | 13.11                       | 6.75                  |                             |                                                  |
|                   | 16.44                       | 5.39                  | (500)                       |                                                  |
|                   | 18.10                       | 4.90                  | (600)                       |                                                  |
|                   | 19.71                       | 4.50                  | (700)                       |                                                  |
|                   | 22.73                       | 3.91                  | (002)                       |                                                  |
|                   | 26.00                       | 3.42                  | (102)                       |                                                  |
| <b>ANP-PDI</b>    | 3.25                        | 27.20                 | (100)                       | Col <sub>rp</sub> (a = 27.06 Å)<br>(b = 14.40 Å) |
|                   | 6.53                        | 13.53                 | (200)                       |                                                  |
|                   | 6.95                        | 12.75                 | (110)                       |                                                  |
|                   | 9.44                        | 9.36                  | (300)                       |                                                  |
|                   | 12.31                       | 7.18                  | (400)                       |                                                  |
|                   | 13.10                       | 6.76                  |                             |                                                  |
|                   | 16.42                       | 5.39                  | (500)                       |                                                  |
|                   | 18.08                       | 4.90                  | (600)                       |                                                  |
|                   | 19.71                       | 4.50                  | (700)                       |                                                  |
|                   | 22.73                       | 3.91                  | (002)                       |                                                  |
|                   | 26.00                       | 3.42                  | (102)                       |                                                  |
| <b>KOD-PDI</b>    | 3.25                        | 27.20                 | (100)                       | Col <sub>rp</sub> (a = 27.06 Å)<br>(b = 14.40 Å) |
|                   | 6.53                        | 13.53                 | (200)                       |                                                  |
|                   | 6.95                        | 12.75                 | (110)                       |                                                  |
|                   | 9.38                        | 9.42                  | (300)                       |                                                  |
|                   | 12.31                       | 7.18                  | (400)                       |                                                  |
|                   | 13.11                       | 6.75                  |                             |                                                  |
|                   | 16.46                       | 5.38                  | (500)                       |                                                  |
|                   | 18.08                       | 4.90                  | (600)                       |                                                  |
|                   | 19.69                       | 4.50                  | (700)                       |                                                  |
|                   | 22.73                       | 3.91                  | (002)                       |                                                  |
|                   | 25.60                       | 3.47                  | (102)                       |                                                  |

Col<sub>rp</sub>: Columnar rectangular ordered phase; Col<sub>rd</sub>: Columnar rectangular disordered phase.

**Table S5.** Contact angles and calculated interfacial energy of PDI derivative films using water and glycerol as hydrophilic liquids.

| <b>PDI</b> s   | <b><math>\theta_{\text{water}}</math> (deg)</b> | <b><math>\theta_{\text{glycerol}}</math> (deg)</b> | <b>Interfacial energy<br/>(mN m<sup>-1</sup>)</b> |
|----------------|-------------------------------------------------|----------------------------------------------------|---------------------------------------------------|
| <b>TYR-PDI</b> | 95                                              | 81                                                 | 24.9                                              |
| <b>AEP-PDI</b> | 93                                              | 80                                                 | 24.5                                              |
| <b>CET-PDI</b> | 85                                              | 72                                                 | 29.0                                              |
| <b>ANP-PDI</b> | 86                                              | 77                                                 | 24.0                                              |
| <b>KOD-PDI</b> | 85                                              | 76                                                 | 24.7                                              |

## References

1. A. Böhm, H. Arms, G. Henning and P. Blaschka, (BASF AG) German Pat. DE 19547209 A1, 1997.
2. F. Würthner, V. Stepanenko, Z. Chen, C. R. Saha-Möller, N. Kocher and D. Stalke, *J. Org. Chem.*, 2004, **69**, 7933–7939.
3. P. Rajasingh, R. Cohen, E. Shirman, L. J. W. Shimon and B. Rybtchinski, *J. Org. Chem.*, 2007, **72**, 5973–5979.
4. M. R. Raj, S. Ramkumar and S. Anandan, *RSC Adv.*, 2013, **3**, 5108–5120.
5. M. R. Raj, K. Arun, M. Ashokkumar and S. Anandan, *org. prep. proc. int.: New J. Org. Synth.*, 2012, **44**, 271–280.
